# Supplementary material
Source: MDPI journal article supplement (https://www.mdpi.com/2076-3298/11/1/3)
Supplement: s1 [file s1]

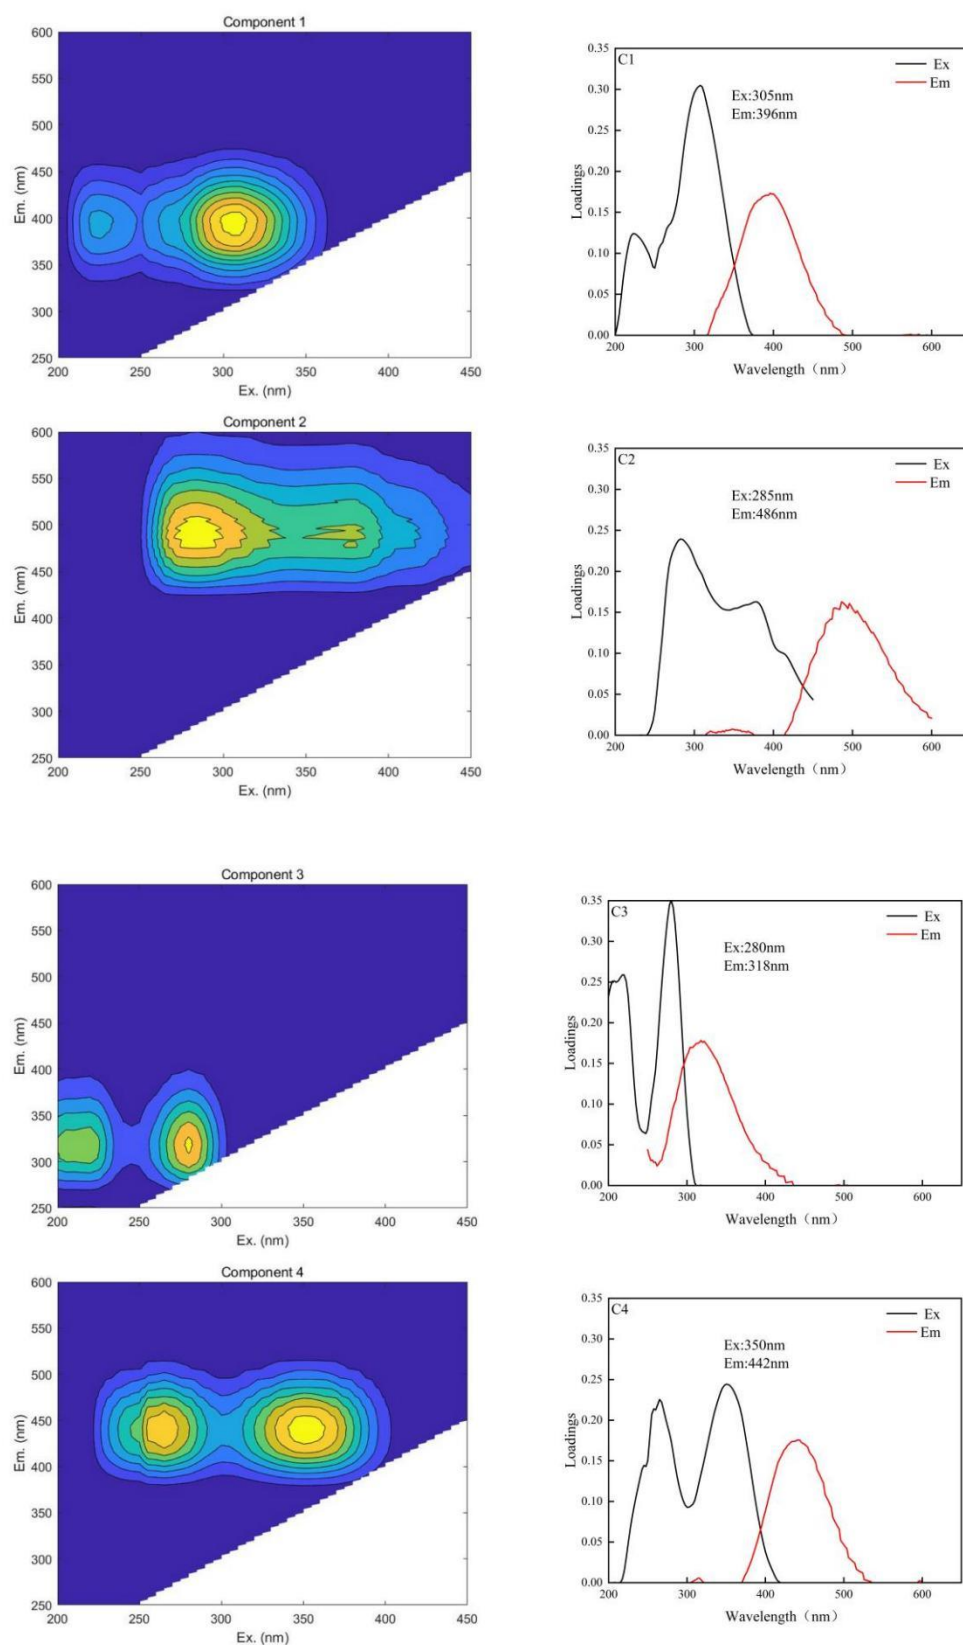

**Fig. S1** Fluorescence spectra and load graphs of fluorescence components of DOM in Dianchi

Lake and Yilong Lake
